# Supplementary material for: Resistance to Fusarium Head Blight, Kernel Damage and Concentration of Fusarium Mycotoxins in Grain of Winter Triticale (x Triticosecale Wittmack) Lines
Source: Preprints.org preprint supplement (doi:10.20944/preprints202011.0142.v1), 2020-11-03
Supplement: Supplementary file 1 [file supplementary]

Table S1. Air temperature and rainfall in May, June and July of 2016, 2107 and 2018 in two experimental locations

| Month | Poznań | | Radzików | |
| --- | --- | --- | --- | --- |
| Rainfall (mm) | Temp. oC | Rainfall (mm) | Temp. oC |
| 2016 | | | | |
| May | 32.2 | 21.0 | 31.6 | 16.0 |
| June | 49.4 | 24.0 | 54.6 | 19.5 |
| July | 130. 0 | 23.5 | 89.8 | 19.8 |
| 2017 | | | | |
| May | 52.8 | 13.6 | 57.0 | 14.6 |
| June | 53.4 | 17.4 | 126.6 | 18.4 |
| July | 168.0 | 17.8 | 70.0 | 18.9 |
| 2018 | | | | |
| May | 16.6 | 17.9 | 73.2 | 17.9 |
| June | 22.8 | 19.4 | 25.2 | 19.3 |
| July | 81.3 | 20.8 | 80.0 | 22.1 |
